# Supplementary material for: Nuclear translocation of spike mRNA and protein is a novel pathogenic feature of SARS-CoV-2
Source: PubMed Central journal article supplement (PMC9536038; doi:10.1101/2022.09.27.509633), 2022-09-27
Supplement: NIHPP2022.09.27.509633V1-supplement-1.pdf [file NIHPP2022.09.27.509633V1-supplement-1.pdf]

480 **Fig S1. NLS prediction in the S protein of pathogenic coronaviruses.** All categories of NLS  
481 motifs were searched in the S protein sequence using the web-based program PSORT II  
482 (<https://psort.hgc.jp/form2.html>) [27] for the S protein ORF amino acid sequence of SARS-CoV-  
483 2 (USA/WA-CDC-WA1/2020 isolate, GenBank accession no. MN985325) (Query 1), SARS-CoV  
484 (Urbani strain, GenBank accession no. AY278741) (Query 2), or MERS-CoV (GenBank accession  
485 no. NC\_019843.3) (Query 3).

486

487 **Fig S2. Detection of the nuclear translocation of S mRNA and S protein.** Confocal images of  
488 SARS-CoV-2-infected airway epithelium (described in Fig 2) were analyzed for spot-to-spot  
489 colocalization using Imaris image analysis software (Oxford Instruments). The left panel shows  
490 the confocal images, the middle panel shows spot-to-spot colocalization, and the right panel shows  
491 merged confocal images and spot-to-spot colocalization. Spot-to-spot colocalization between the  
492 nucleus and S protein or S mRNA is indicated by a different color. The images represent multiple  
493 independent cross sections of the SARS-CoV-2-infected airway epithelium (from 3 independent  
494 donors).

495

496 **Fig S3. The translocation of S mRNA and S protein includes both the inside and outer surface**  
497 **of the nucleus.** From the images shown in Fig 3, the signals of S mRNA and S protein were plotted  
498 in the graph by Imaris image analysis software. The distance and intensity of all S mRNA or S  
499 protein from the nuclear surface (considered 0) were plotted. A negative value indicates that S  
500 mRNA or S protein resides inside the nucleus. The higher the negative value is, the farther the  
501 distance from the nuclear surface. In contrast, a positive value indicates that S mRNA or S protein  
502 resides on the nucleus surface and beyond in the cytoplasm. The higher the positive value is, the  
503 farther the distance from the nuclear surface.

504

505 **Fig S4. The SARS-CoV S protein does not translocate into the nucleus.** A four-week  
506 pseudostratified airway epithelium was infected with SARS-CoV at an MOI of 0.1 for four days,  
507 fixed, paraffin-embedded and sectioned at a thickness of 5  $\mu\text{m}$  for immunohistochemistry slide  
508 preparation. S protein (shown in cyan) was detected by immunofluorescence-based protein

509 detection using SARS-CoV/SARS-CoV-2 S specific rabbit polyclonal primary antibody and anti-  
510 rabbit secondary antibody. The confocal image was analyzed for spot-to-spot colocalization using  
511 Imaris image analysis software. The left panel shows a confocal image, the middle panel shows  
512 spot-to-spot colocalization, and the right panel shows merged confocal images and spot-to-spot  
513 colocalization. The images represent multiple independent cross sections of SARS-CoV-infected  
514 airway epithelium (at least two donors).

515

516 **Fig S5. S mRNA and S protein colocalization was spatially evident in all possible ways inside**  
517 **the infected cell.** The confocal images shown in Figs. 3 & 4 were further visualized at a higher  
518 magnification to detect S mRNA and S protein colocalization spatially. S protein and S mRNA  
519 distribution and colocalization in the cytoplasm (top panel), on the nuclear surface (middle panel)  
520 and inside the nucleus (bottom panel). The specific region of colocalization is indicated by a white  
521 spot. The colors were made translucent to show colocalization. Scale bar 0.2  $\mu\text{m}$ .

522

523 **Fig S6. NLS motif prediction in the N protein of pathogenic coronaviruses.** All categories of  
524 NLS motifs were searched in the N protein sequence using the web-based program PSORT II  
525 (<https://psort.hgc.jp/form2.html>) [27] for the N protein ORF of SARS-CoV-2 (USA/WA-CDC-  
526 WA1/2020 isolate, GenBank accession no. MN985325) (Query 1), SARS-CoV (Urbani strain,  
527 GenBank accession no. AY278741) (Query 2), or MERS-CoV (GenBank accession no.  
528 NC\_019843.3) (Query 3).

529

530 **Fig S7. Nuclear translocation of the N protein of pathogenic coronaviruses.** Four-week  
531 pseudostratified airway epithelium was infected with SARS-CoV-2, SARS-CoV, or MERS-CoV  
532 at an MOI of 0.1 for four days, fixed, paraffin-embedded and sectioned at a thickness of 5  $\mu$ m for  
533 immunohistochemistry slide preparation. SARS-CoV-2 or SARS-CoV N protein (green) was  
534 detected by a SARS-CoV/SARS-CoV-2 N protein-specific antibody. Similarly, the MERS N  
535 protein (green) was detected by the MERS N protein-specific antibody. The nucleus (shown in  
536 blue) was detected by DAPI staining. The confocal images were analyzed for spot-to-spot  
537 colocalization. The left panel shows a confocal image, the middle panel shows spot-to-spot  
538 colocalization, and the right panel shows merged confocal images and spot-to-spot colocalization.  
539 Spot colocalization between the nucleus and N protein is indicated by a different color. The images  
540 represent multiple independent technical replicates from at least one independent experiment for  
541 one donor (donor #1).

542

543 **Fig S8. NLS motif distribution in the N protein in different pathogenic coronaviruses.** The  
544 sequences of the N protein of the SARS-CoV-2 N protein (nCoV-WA1-2020, GenBank accession  
545 no. MN985325), SARS-CoV N protein (Urbani Strain, GenBank accession no. AY278741), and  
546 MERS-CoV N protein (HCoV-EMC/2012, GenBank accession no. NC\_019843) by NCBI's  
547 constraint-based multiple alignment tool COBALT [25]. All categories of NLS motifs are shown  
548 in the colored rectangle box: pat4: green; pat7: blue; bipartite 1: black; bipartite 2: orange.

549

550 **S1 dataset 1.** Prediction of SARS-CoV-2 S protein and genome interaction

551 **S2 dataset 2.** Prediction of SARS-CoV-2 N protein and genome interaction
